# Supplementary figures and images for: Female sex hormones are necessary for the metabolic effects mediated by loss of Interleukin 18 signaling
Source: PubMed Central journal article supplement — Mol Metab. 2018 Apr 12;12:89–97. doi: 10.1016/j.molmet.2018.04.005 (PMC6001917; doi:10.1016/j.molmet.2018.04.005), 2018-04-12

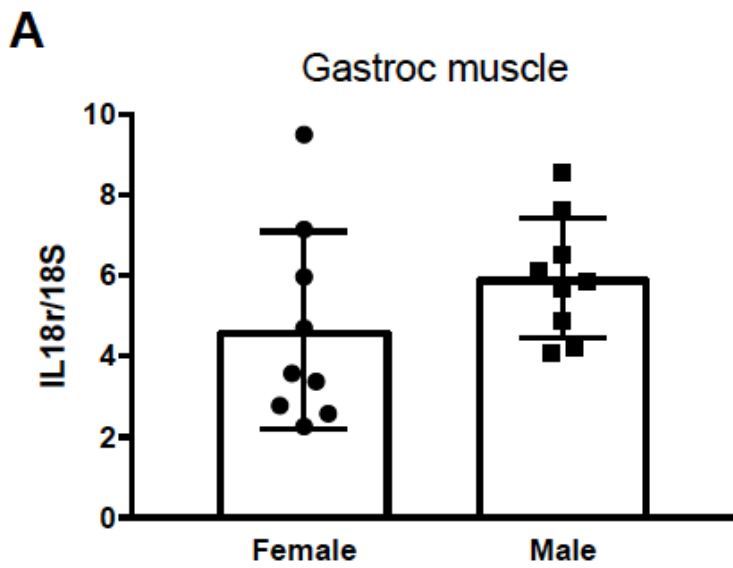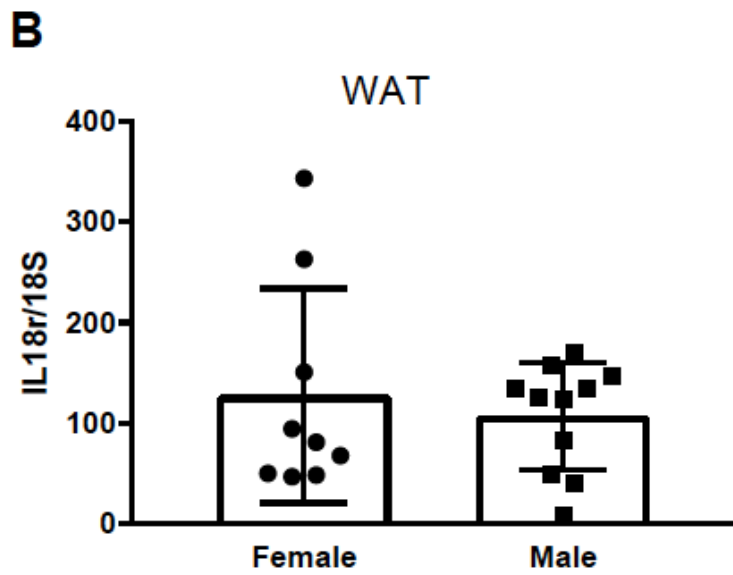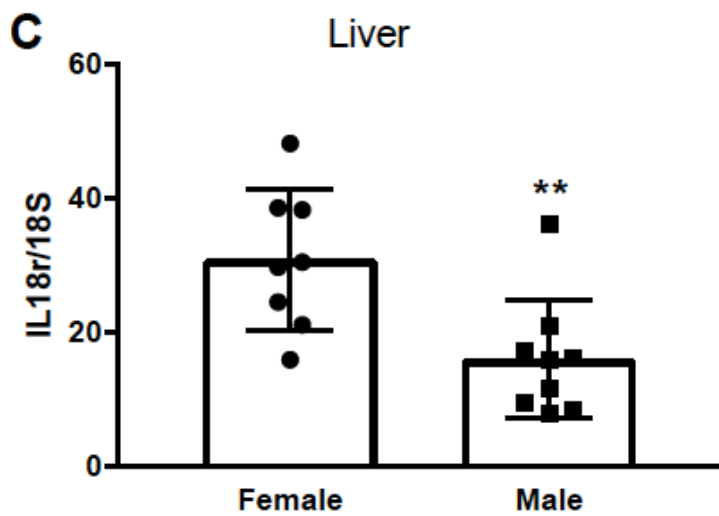

**A**

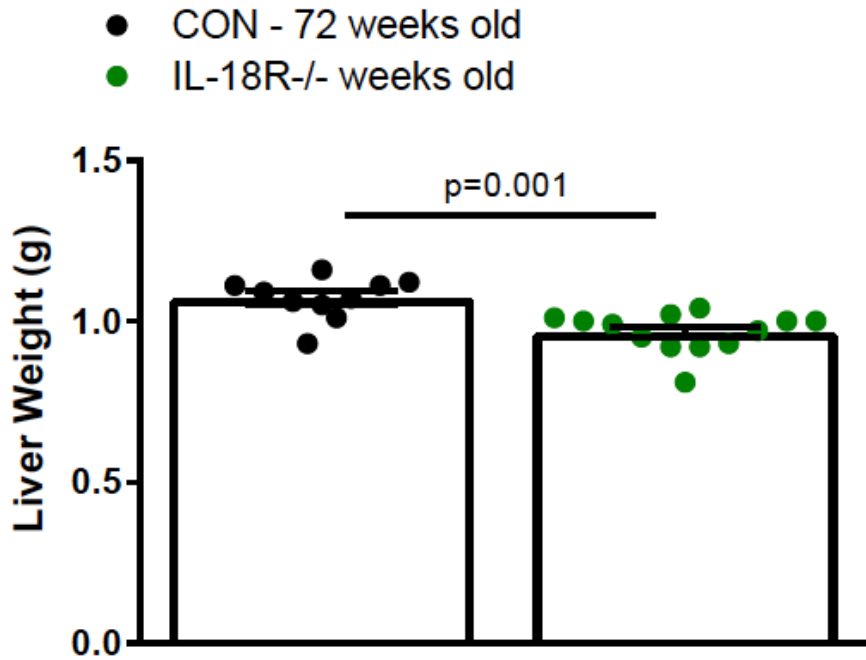

**B**

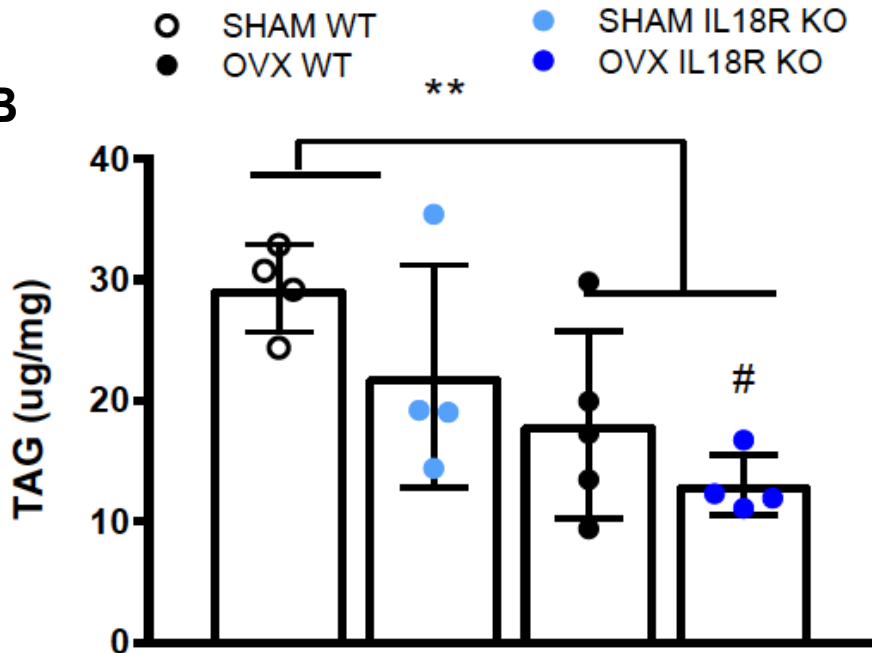

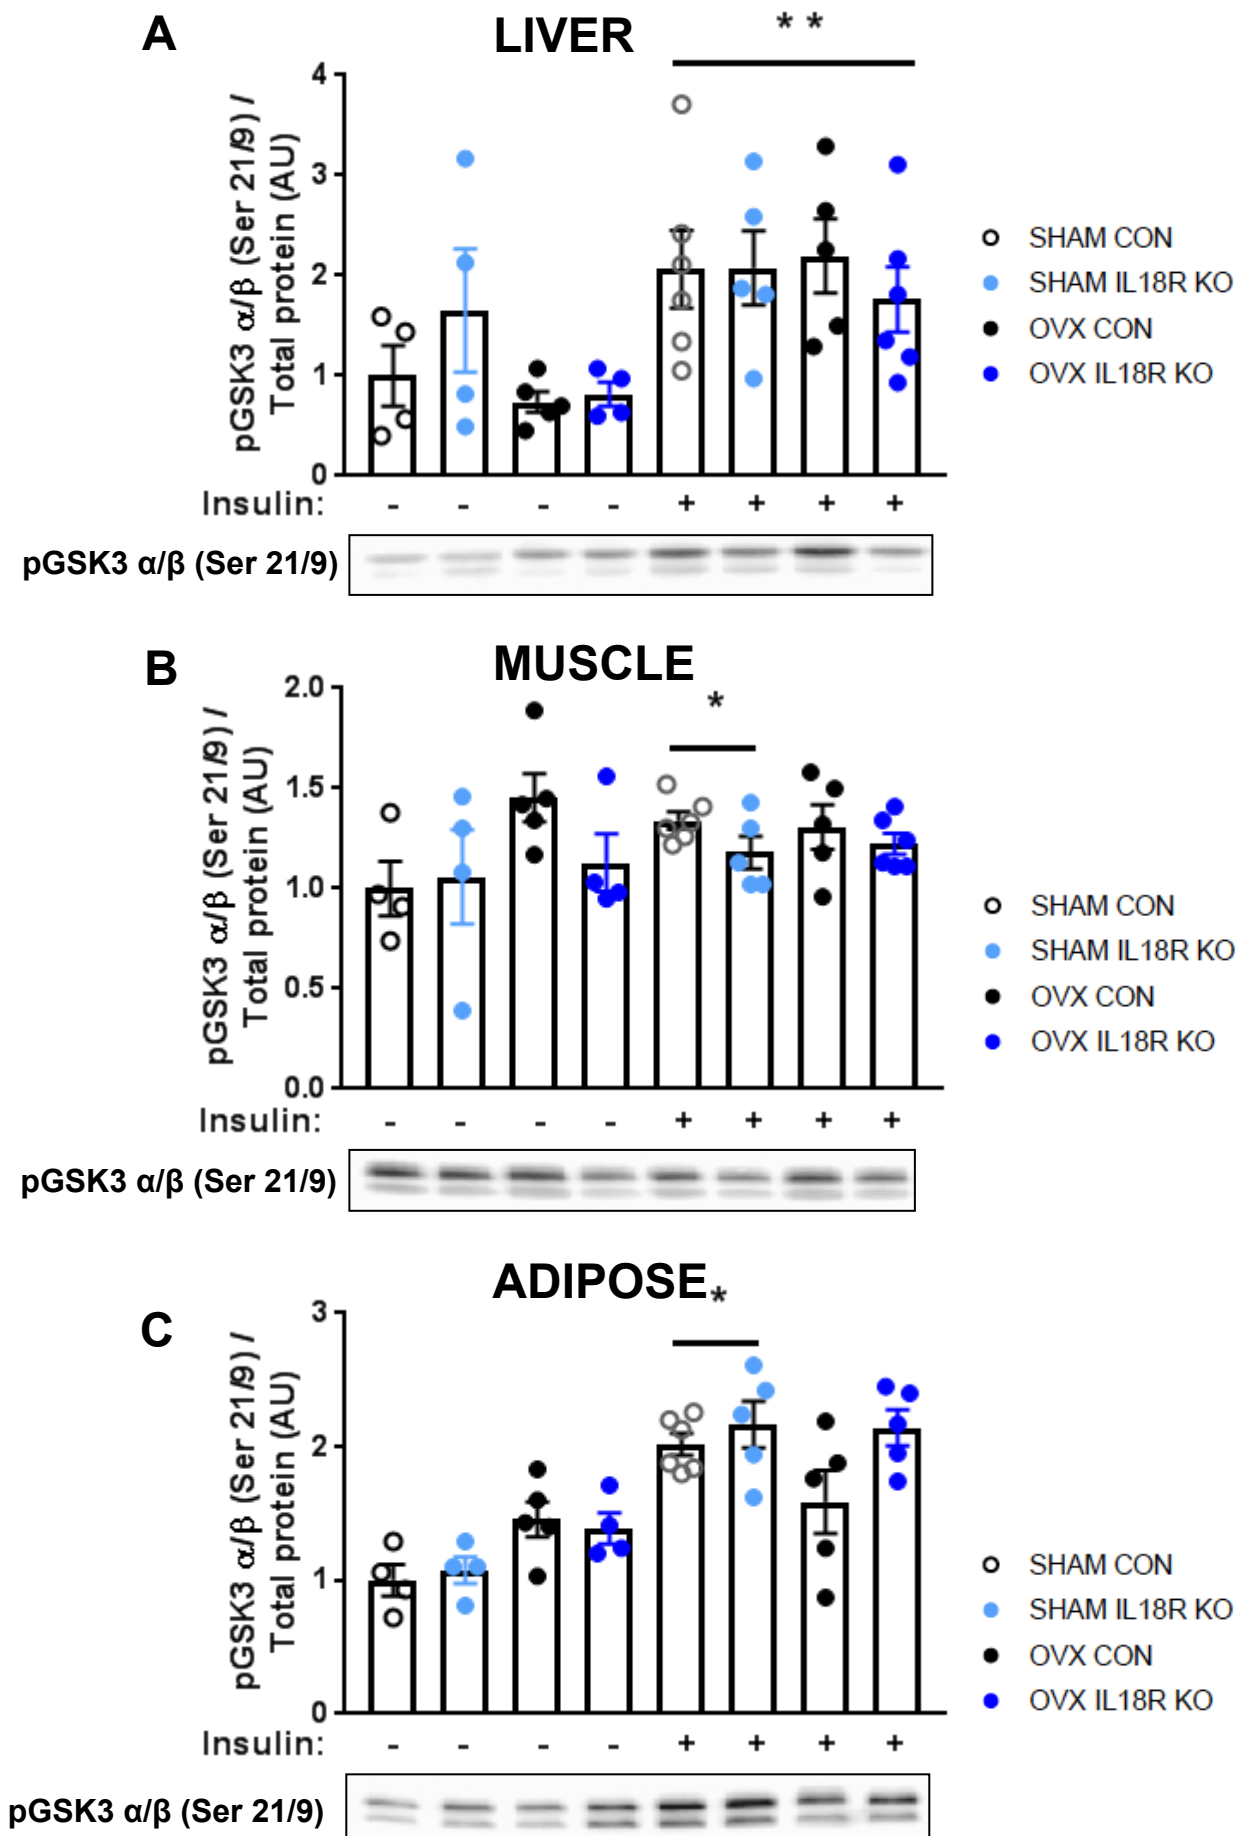

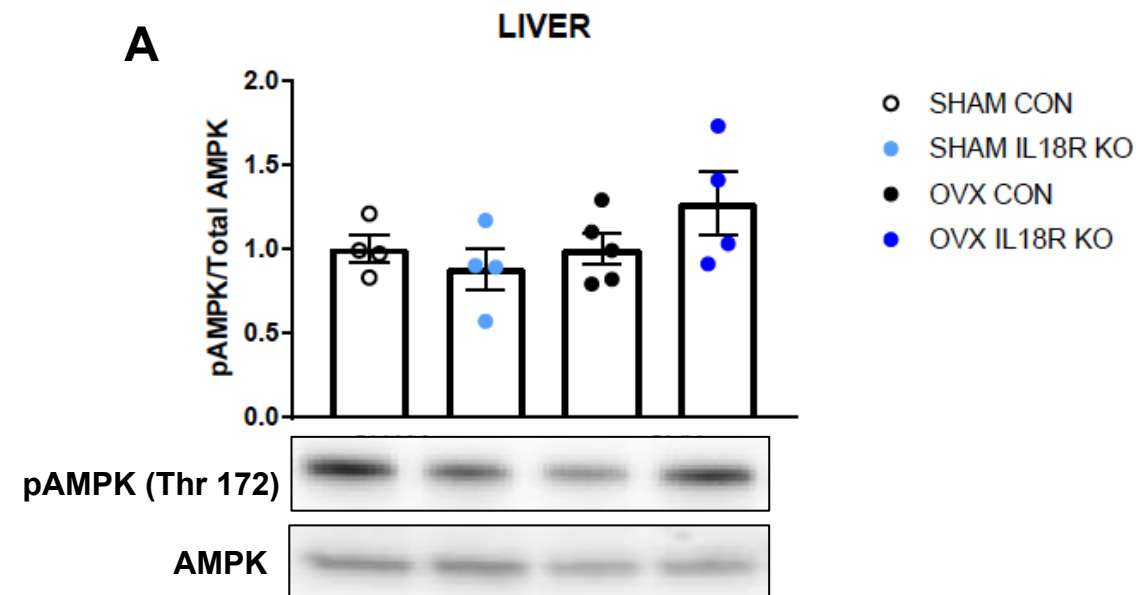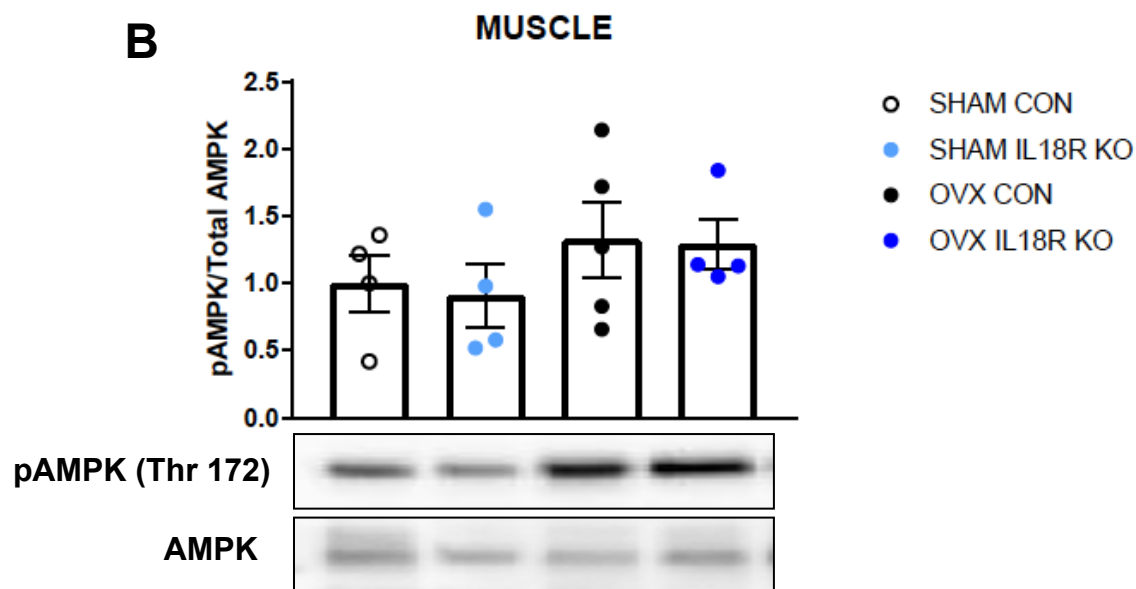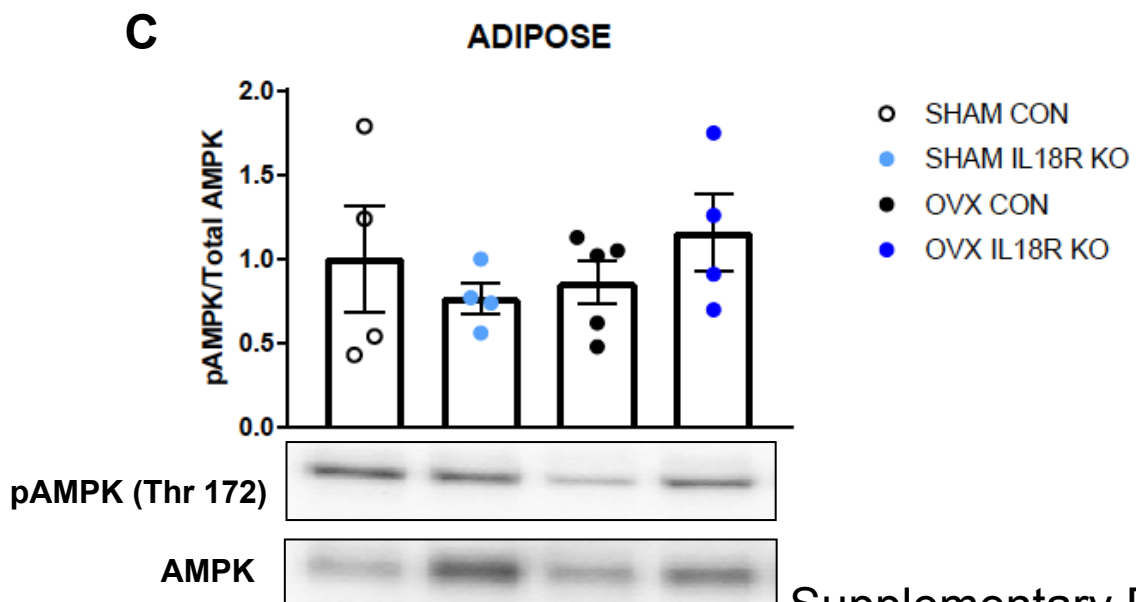

Supplement: mmc1.pdf [file mmc1.pdf]
